# Supplementary material for: The optimal stereotactic body radiotherapy dose with immunotherapy for pulmonary oligometastases: a retrospective cohort study
Source: PubMed Central journal article supplement — J Thorac Dis. 2024 Oct 25;16(10):7072–85. doi: 10.21037/jtd-24-1624 (PMC11565358; doi:10.21037/jtd-24-1624), 2024-10-25
Supplement: jtd-16-10-7072-supplementary.pdf [file jtd-16-10-7072-supplementary.pdf]

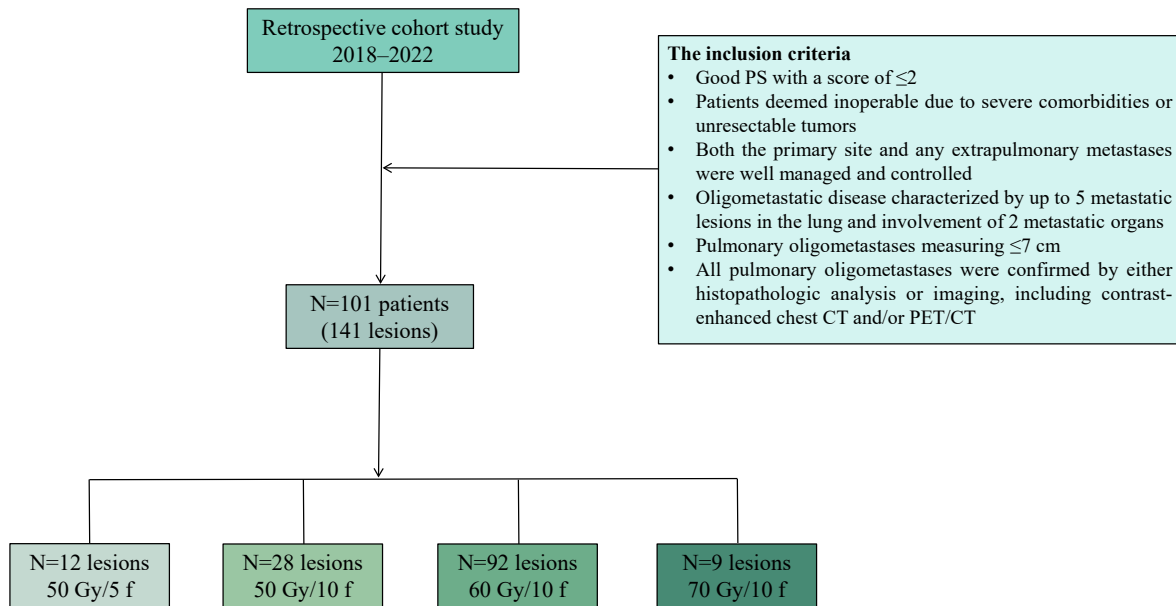

**Figure S1** Flowchart about this retrospective study. PS, performance status; CT, computed tomography; PET, positron emission tomography; f, fractions.

**Table S1** Dose constraints for organs at risk in 5-fraction and 10-fraction SBRT regimens

| Organ at risk     | Dose constraints                   |                                  |
|-------------------|------------------------------------|----------------------------------|
|                   | 5-fraction regimen                 | 10-fraction regimen              |
| Brachial plexus   | Optimal: 30.5 Gy, mandatory: 32 Gy | Optimal: 35 Gy, mandatory: 39 Gy |
| Esophagus         | Optimal: 35 Gy                     | Optimal: 40 Gy                   |
| Heart             | Optimal: 53 Gy, mandatory: 60 Gy   | Optimal: 60 Gy, mandatory: 65 Gy |
| Lungs (V20)       | 10%                                | 10%                              |
| Lungs (mean dose) | 8 Gy                               | 8 Gy                             |
| Skin              | Optimal: 39.5 Gy                   | Optimal: 48 Gy                   |
| Trachea           | Optimal: 35 Gy                     | Optimal: 38 Gy                   |

SBRT, stereotactic body radiotherapy.

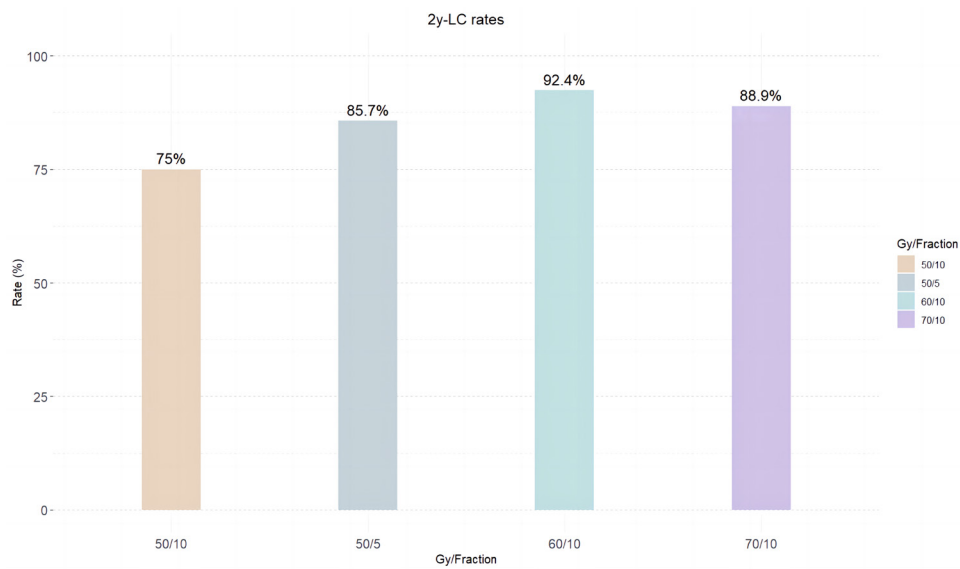

**Figure S2** Effect of different dose-splitting modes on the LC rate. LC, local control.

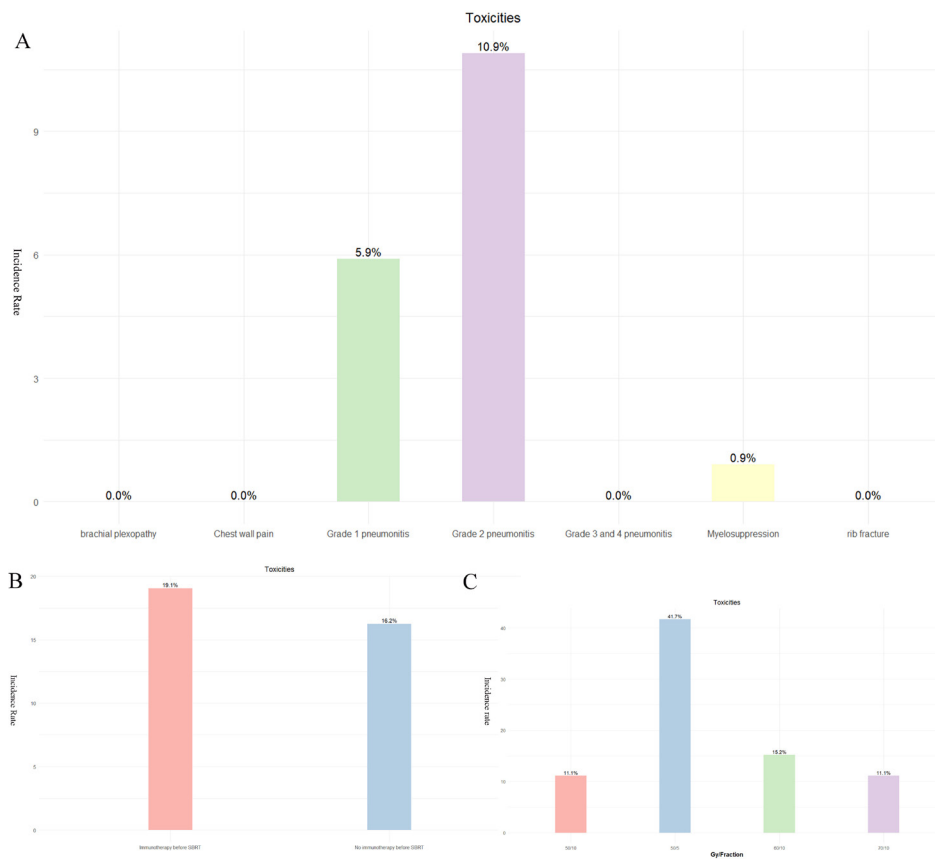

**Figure S3** Bar graph illustrating the toxicity analysis. (A) Distribution of toxicities among all patients. (B) Subgroup analysis of the effect of prior immunotherapy on toxicities in all patients. (C) Toxicities associated with different dose-escalation modes.
